# Supplementary material
Source: Royal Society of Chemistry journal article supplement (doi:10.1039/d5em00856e)
Supplement: d5em00856e1.pdf [file d5em00856e1.pdf]

1

**Table S1. Industry Classification Screening**

| Basic Information Collection |      | Industry Classification Screening                |      |                                                 |      | Total                          |      |
|------------------------------|------|--------------------------------------------------|------|-------------------------------------------------|------|--------------------------------|------|
| Map<br>Crawling              | 1722 | Keyword Screening for Heavy Pollution Industries |      | 107                                             |      |                                |      |
|                              |      | Remaining Unfiltered                             | 1615 | Manual Screening Heavy Pollution Industries     | 14   | Heavy Pollution Industries     | 121  |
|                              |      |                                                  |      | Manual Screening Non-heavy Pollution Industries | 1601 | Non-heavy Pollution Industries | 1601 |

2

3

**Table S2. Statistics of Industrial Source Data Across Different Time Periods**

| Industrial Pollution Source Category | 1949-1975 | 1976-2007 | 2008-2019 |
|--------------------------------------|-----------|-----------|-----------|
| a. Chemical                          | 1         | 23        | 31        |
| b. Petrochemical                     | 3         | 11        | 18        |
| c. Cement                            | 2         | 8         | 17        |
| d. Metallurgy                        | 3         | 7         | 12        |
| e. Mining                            |           | 6         | 12        |
| f. Building Materials                |           | 6         | 10        |
| g. Textile                           |           | 2         | 7         |
| h. Brewing                           | 1         | 4         | 5         |
| i. Coal                              |           | 2         | 3         |
| j. Pharmaceutical                    |           | 2         | 3         |
| k. Fermentation                      |           |           | 2         |
| l. Steel                             |           |           | 1         |

4

5

6

7 **Table S3. Functional Relationship Between Pollution Source Density and Temporal**

8 **Response of Soil Pb Content**

|             | 1949-1975 Pollution | 1976-2007 Pollution  | 2008-2019 Pollution |
|-------------|---------------------|----------------------|---------------------|
| 1975year Pb | $a: y=27.59x+21.58$ | $b: y=13.75x+20.94$  | $c: y=9.59x+20.96$  |
| 2007year Pb | $d: y=85.06x+24.85$ | $e: y=31.58x+25.38$  | $f: y=23.89x+24.71$ |
| 2019year Pb | $g: y=446.5x+51.04$ | $h: y=193.83x+44.99$ | $i: y=133.56x+43.6$ |

9

10 **Table S4. Functional Relationship Between Pollution Source Density and Temporal**

11 **Response of Soil Cd Content**

|             | 1949-1975 Pollution   | 1976-2007 Pollution   | 2008-2019 Pollution   |
|-------------|-----------------------|-----------------------|-----------------------|
| 1975year Cd | $a: y=0.01x+0.0765$   | $b: y=0.012x+0.0776$  | $c: y=0.014x+0.0779$  |
| 2007year Cd | $d: y=0.1448x+0.0808$ | $e: y=0.0834x+0.0807$ | $f: y=0.0569x+0.0754$ |
| 2019year Cd | $g: y=10.377x+0.6519$ | $h: y=3.726x+0.5704$  | $i: y=2.614x+0.5458$  |

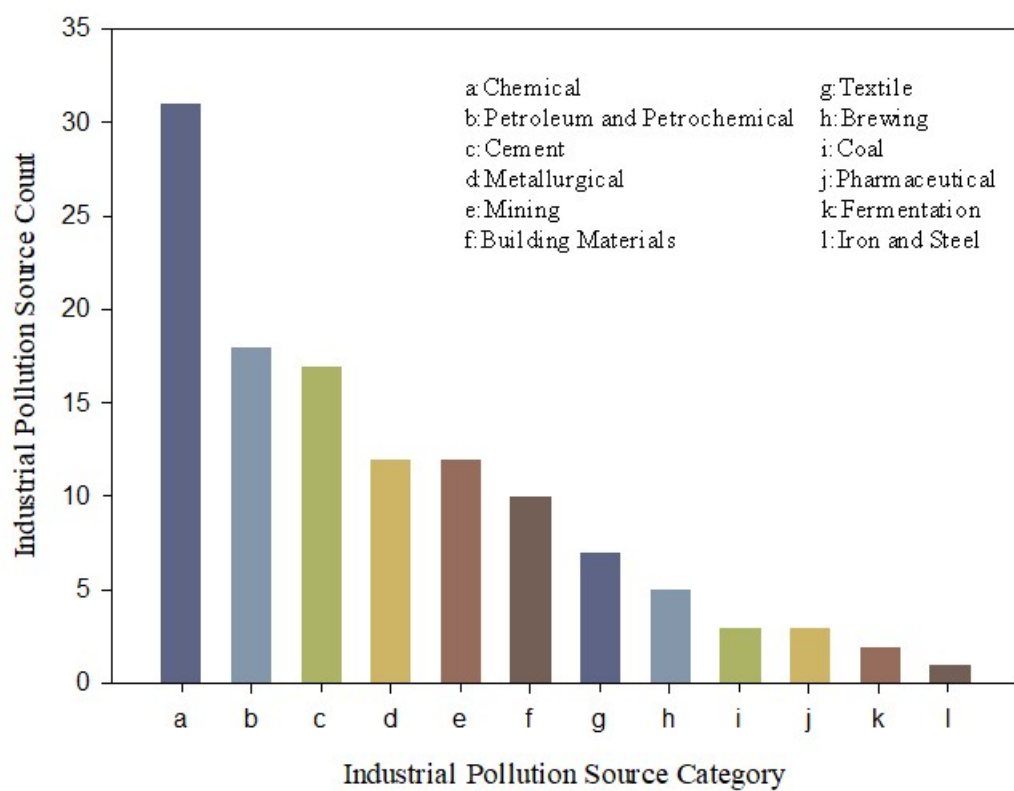

12

13

**Fig. S1. Number of Polluting Industries**

14

15
